# Supplementary material for: Effects of rainfall patterns and land cover on the subsurface flow generation of sloping Ferralsols in southern China
Source: PLoS One. 2017 Aug 8;12(8):e0182706. doi: 10.1371/journal.pone.0182706 (PMC5549742; doi:10.1371/journal.pone.0182706)
Supplement: S1 File — (XLSX) [file pone.0182706.s001.xlsx]

## Sheet: runoff value
		Runoff value (%)
		Land cover types	Surface flow	Subsurface flow 30cm	Subsurface flow 60cm
		Grass cover	1.525	1.6075	1.0425
		Litter cover	1.9325	2.96	1.1525
		Bare land	32.58	0.2275	0.345
		Total runoff flow value (%)
		Land cover types	rainfall pattern Ⅰ		rainfall pattern Ⅱ		rainfall pattern Ⅲ		rainfall pattern Ⅳ
			mean	Std. dev.	mean	Std. dev.	mean	Std. dev.	mean	Std. dev.
		Grass cover	4.03	1.2	5.06	1.19	3.83	1.69	3.37	2.08
		Litter cover	6.48	2.37	6.54	1.49	5.32	2.02	4.13	0.78
		Bare land	47.2	10.07	15.13	8.75	23.21	7.23	47.12	10.4
		Surface flow value(%)
		Land cover types	rainfall pattern Ⅰ		rainfall pattern Ⅱ		rainfall pattern Ⅲ		rainfall pattern Ⅳ
			mean	Std. dev.	mean	Std. dev.	mean	Std. dev.	mean	Std. dev.
		Grass cover	1.51	0.39	1.68	0.24	1.48	0.79	1.43	0.67
		Litter cover	1.95	0.38	1.96	0.1	1.93	0.89	1.89	0.74
		Bare land	46.77	10.08	13.85	6.58	22.66	12.3	47.04	11.26
		Subsurface flow 30cm value (%)
		Land cover types	rainfall pattern Ⅰ		rainfall pattern Ⅱ		rainfall pattern Ⅲ		rainfall pattern Ⅳ
			mean	Std. dev.	mean	Std. dev.	mean	Std. dev.	mean	Std. dev.
		Grass cover	2.35	0.68	1.6	0.61	1.26	0.61	1.22	1.15
		Litter cover	4.42	1.56	3.36	1.23	2.55	0.99	1.51	0.65
		Bare land	0.14	0.05	0.54	0.23	0.21	0.18	0.02	0.01
		Subsurface flow 60cm value (%)
		Land cover types	rainfall pattern Ⅰ		rainfall pattern Ⅱ		rainfall pattern Ⅲ		rainfall pattern Ⅳ
			mean	Std. dev.	mean	Std. dev.	mean	Std. dev.	mean	Std. dev.
		Grass cover	1.49	0.25	1.06	0.73	0.89	0.85	0.73	0.77
		Litter cover	1.41	0.39	1.19	0.28	1.13	0.34	0.88	0.7
		Bare land	0.4	0.23	0.58	0.36	0.35	0.26	0.05	0.02
			次数	Ⅰ	Ⅱ	Ⅲ	Ⅳ
			2010	5	2	14	17
			2011	9	1	12	10
			2012	10	3	19	12
				24	6	45	39
			降雨量
				Ⅰ	Ⅱ	Ⅲ	Ⅳ
			2010	58.4	68	28.6	26.6
			2011	49.5	55.8	24.4	19.9
			2012	73.2	70.8	31.4	33.8
			雨强
				Ⅰ	Ⅱ	Ⅲ	Ⅳ
			2010	11.9	6.7	11.1	27.7
			2011	10.1	5.8	9.2	25.5
			2012	15	6.9	7.1	30.8
				12.3333	6.46667	9.13333	28
				12.3	6.5	9.1	28

## Sheet: Initial runoff-yielding time
	Initial runoff-yielding time (min)
	Subsurface flow	Grass cover		Litter cover		Bare land
		mean	Std. dev.	mean	Std. dev.	mean	Std. dev.
	30cm	457.275	153.7	186.4	86.32	690.725	126.89
	60cm	749.65	231.96	541.8	135.11	950.45	221.23
	Subsurface flow 30cm (min)
	Land cover types	rainfall patternⅠ		rainfall patternⅡ		rainfall pattern Ⅲ		rainfall pattern Ⅳ
		mean	Std. dev.	mean	Std. dev.	mean	Std. dev.	mean	Std. dev.
	Grass cover	282.4	118.9	985	70.7	468.7	109.3	93	24.7
	Litter cover	176	85.6	220	89.9	314.6	113.5	35	13.6
	Bare land	802.8	170.3	1160	203.1	669.1	147.3	131	65.9
	Subsurface flow 60cm (min)
	Land cover types	rainfall patternⅠ		rainfall patternⅡ		rainfall pattern Ⅲ		rainfall pattern Ⅳ
		mean	Std. dev.	mean	Std. dev.	mean	Std. dev.	mean	Std. dev.
	Grass cover	679.6	267.9	1615	422.3	605.1	168.9	98.9	21.6
	Litter cover	447.4	193.3	945	113.1	629.8	131.2	145	32.9
	Bare land	1174.6	334.6	1385	381.8	1045.9	242.3	196.3	39

## Sheet: Runoff duration
	Runoff duration (min)
	Subsurface flow	Grass cover		Litter cover		Bare land
		mean	Std. dev.	mean	Std. dev.	mean	Std. dev.
	30cm	1347.12	438.18	1583.38	546.59	814.65	277.32
	60cm	1902.53	477.377	1820.95	412.55	937.225	229.36
	Subsurface flow 30cm (min)
	Land cover types	rainfall patternⅠ		rainfall patternⅡ		rainfall pattern Ⅲ		rainfall pattern Ⅳ
		mean	Std. dev.	mean	Std. dev.	mean	Std. dev.	mean	Std. dev.
	Grass cover	1838.6	535.5	2175	554.6	1081.4	252.2	293.5	113.7
	Litter cover	2128	445.4	2290	205.1	1175.1	391.2	740.4	130.9
	Bare land	766.3	112.3	2060	499.1	360	117.8	72.3	28.8
	Subsurface flow 60cm (min)
	Land cover types	rainfall patternⅠ		rainfall patternⅡ		rainfall pattern Ⅲ		rainfall pattern Ⅳ
		mean	Std. dev.	mean	Std. dev.	mean	Std. dev.	mean	Std. dev.
	Grass cover	2463.8	452.1	2100	357.6	1667.7	686.1	1378.6	353.1
	Litter cover	2655	464.4	2620	449.5	1450	404.9	558.8	127.7
	Bare land	1020	215.5	2060	429.4	522.7	165.3	146.2	93.5
